CORRECTION

# Correction: Genetics, Receptor Binding Property, and Transmissibility in Mammals of Naturally Isolated H9N2 Avian Influenza Viruses

Xuyong Li, Jianzhong Shi, Jing Guo, Guohua Deng, Qianyi Zhang, Jinliang Wang, Xijun He, Kaicheng Wang, Jiming Chen, Yuanyuan Li, Jun Fan, Huiui Kong, Chunyang Gu, Yuantao Guan, Yasuo Suzuki, Yoshihiro Kawaoka, Liling Liu, Yongping Jiang, Guobin Tian, Yanbing Li, Zhigao Bu, Hualan Chen

There is an error in [Fig 3](#). The genotype number of DK/ZJ/C1036/09 virus and the maximum body weight change of mice infected with this virus are missing. Please see the correct [Fig 3](#) here.

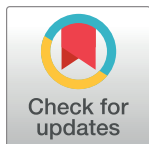

## OPEN ACCESS

**Citation:** Li X, Shi J, Guo J, Deng G, Zhang Q, Wang J, et al. (2020) Correction: Genetics, Receptor Binding Property, and Transmissibility in Mammals of Naturally Isolated H9N2 Avian Influenza Viruses. *PLoS Pathog* 16(1): e1008284. <https://doi.org/10.1371/journal.ppat.1008284>

**Published:** January 8, 2020

**Copyright:** © 2020 Li et al. This is an open access article distributed under the terms of the [Creative Commons Attribution License](#), which permits unrestricted use, distribution, and reproduction in any medium, provided the original author and source are credited.

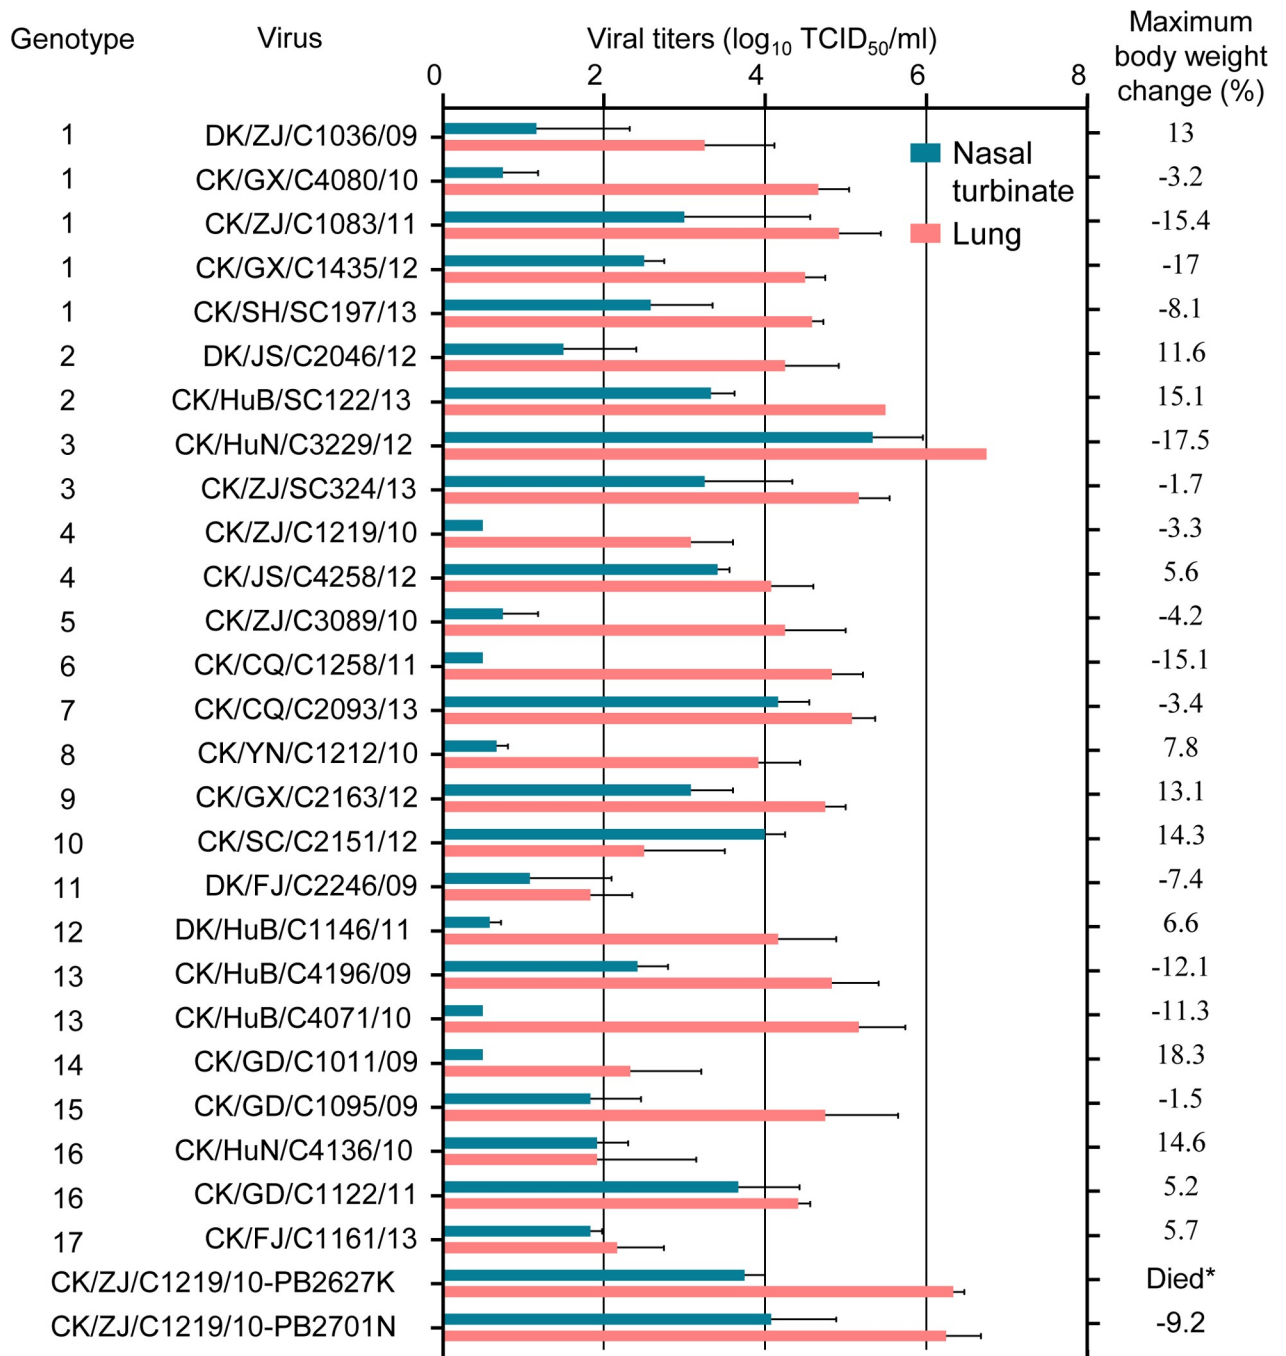

**Fig 3. Replication and virulence of H9N2 viruses in mice.** Virus titers in organs of mice on day 3 p.i. with 10<sup>6</sup> EID<sub>50</sub> of test virus. Data shown are the mean titers from three mice; the error bars indicate the standard deviations. \*, mice inoculated with CK/ZJ/C1219/10-PB2/627K virus died before day 8 p.i. The dashed line indicates the lower limit of detection.

<https://doi.org/10.1371/journal.ppat.1008284.g001>

### Reference

- Li X, Shi J, Guo J, Deng G, Zhang Q, Wang J, et al. (2014) Genetics, Receptor Binding Property, and Transmissibility in Mammals of Naturally Isolated H9N2 Avian Influenza Viruses. *PLoS Pathog* 10(11): e1004508. <https://doi.org/10.1371/journal.ppat.1004508> PMID: 25411973
